# Supplementary material for: Global flux-based ozone risk assessment for wheat up to 2100 under different climate scenarios
Source: Copernicus journal article supplement (doi:10.5194/egusphere-2024-2573), 2024-08-30
Supplement: Supplementary file [file egusphere-2024-2573-AC4-supplement.pdf]

**Table S4: p-values and 95% confidence intervals (corrected with Bonferroni) corresponding to the differences indicated in Table 4. Boundaries for p-values are defined according to the TOAR-II Recommendations for Statistical Analysis (Chang et al. 2023). p<0.01 indicates very high certainty and p>0.33 indicates very low certainty or no evidence.**

| Region <sup>b</sup> | 2050 ΔPOD <sub>6</sub>  |                    |                    | 2100 ΔPOD <sub>6</sub> |                     |                     |
|---------------------|-------------------------|--------------------|--------------------|------------------------|---------------------|---------------------|
|                     | [mmol m <sup>-2</sup> ] |                    |                    |                        |                     |                     |
|                     | SSP1                    | SSP3               | SSP5               | SSP1                   | SSP3                | SSP5                |
| East Asia           | 0.02 [-1.25,-0.03]      | <0.01 [-0.16,0.98] | 0.04 [0.01,1.03]   | <0.01 [-1.72,-0.72]    | >0.33 [-0.36,0.78]  | >0.33 [-1.07,0.17]  |
| South-East Asia     | >0.33 [-0.38,0.06]      | <0.01 [0.38,0.84]  | <0.01 [0.34,0.82]  | <0.01 [-0.78,-0.40]    | <0.01 [0.43,0.89]   | 0.05 [-0.40,0.00]   |
| South Asia          | >0.33 [-0.45,0.43]      | <0.01 [0.59,1.65]  | <0.01 [0.19,1.29]  | 0.02 [-0.89,-0.03]     | <0.01 [0.81,1.91]   | >0.33 [-0.21,0.77]  |
| Central Asia        | <0.01 [-0.40,-0.10]     | <0.01 [0.44,0.86]  | 0.01 [0.04,0.50]   | <0.01 [-0.52,-0.24]    | <0.01 [0.38,0.78]   | >0.33 [-0.22,0.10]  |
| North America       | <0.01 [-2.13,-0.47]     | 0.23 [-1.59,0.09]  | >0.33 [-1.49,0.23] | <0.01 [-2.19,-0.55]    | <0.01 [-1.81,-0.15] | >0.33 [-1.43,0.27]  |
| Central America     | <0.01 [-0.58,-0.42]     | <0.01 [0.23,0.47]  | <0.01 [0.49,0.73]  | <0.01 [-0.79,-0.63]    | <0.01 [0.31,0.59]   | <0.01 [-0.35,-0.13] |
| South America       | 0.29 [-1.03,0.09]       | >0.33 [-0.31,0.89] | >0.33 [-0.38,0.82] | 0.02 [-1.16,-0.04]     | >0.33 [-0.26,0.88]  | >0.33 [-0.90,0.24]  |
| Rus.-Bel.-Uk.       | <0.01 [-1.11,-0.31]     | >0.33 [-0.64,0.34] | >0.33 [-0.71,0.17] | <0.01 [-1.19,-0.43]    | >0.33 [-0.68,0.24]  | >0.33 [-0.75,0.15]  |
| Europe              | <0.01 [-1.36,-0.42]     | >0.33 [-0.69,0.29] | >0.33 [-0.68,0.42] | <0.01 [-1.43,-0.51]    | >0.33 [-0.73,0.23]  | >0.33 [-0.55,0.45]  |
| North Africa        | <0.01 [-0.56,-0.42]     | <0.01 [0.26,0.44]  | <0.01 [0.10,0.28]  | <0.01 [-0.71,-0.57]    | <0.01 [0.29,0.49]   | <0.01 [-0.19,-0.03] |
| Sub-Saharan Africa  | 0.18 [-0.01,0.13]       | <0.01 [0.38,0.60]  | <0.01 [0.68,0.88]  | <0.01 [-0.30,-0.18]    | <0.01 [0.83,1.03]   | <0.01 [0.40,0.74]   |
| Middle East         | <0.01 [-0.48,-0.18]     | <0.01 [0.45,0.81]  | >0.33 [-0.14,0.34] | <0.01 [-0.75,-0.53]    | <0.01 [0.53,0.83]   | >0.33 [-0.20,0.1]   |

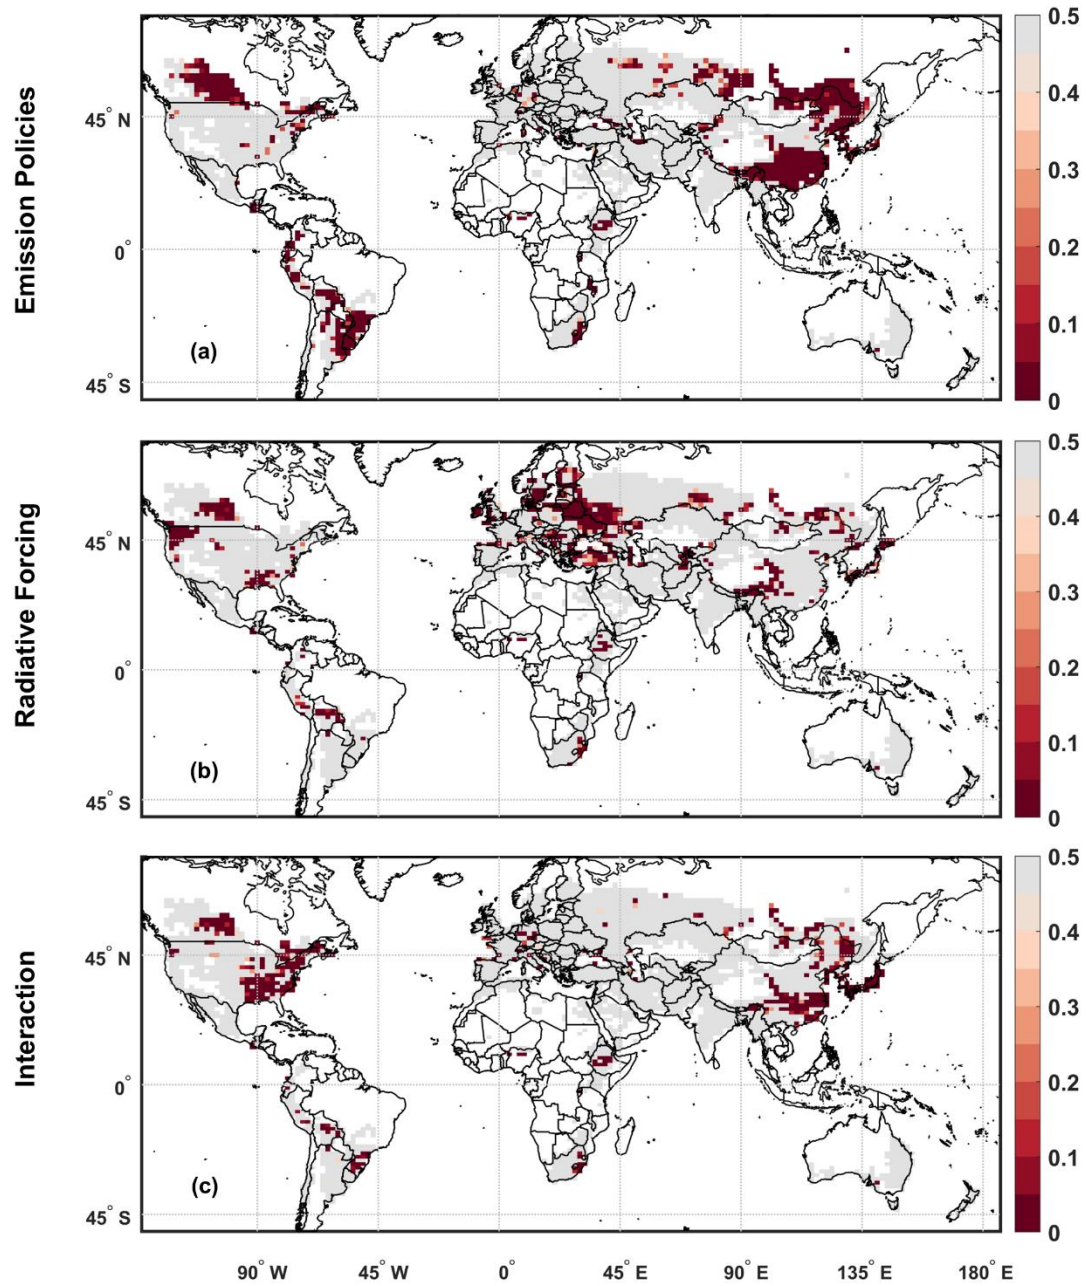

5

Figure S3: p-values for the ANOVA (Figure 8) corresponding to the factors: (a) Emission Policies (EP), (b) Radiative Forcing (RF), and (c) Interaction (I).
